# Supplementary material
Source: PubMed Central journal article supplement (PMC1310567)

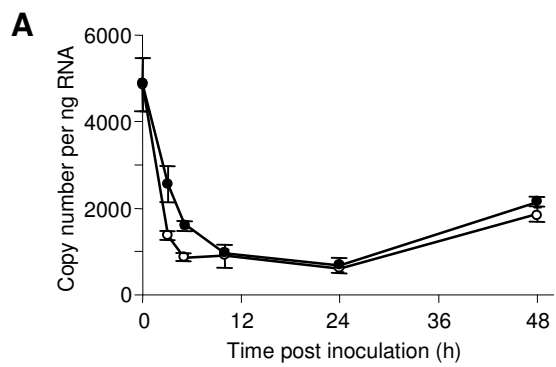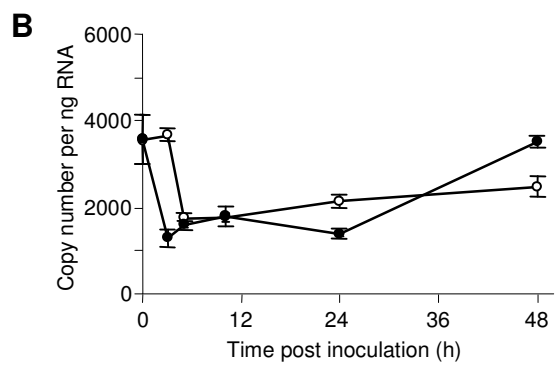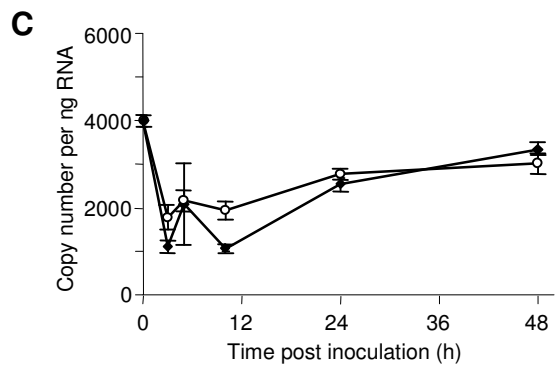

Supplement: plntphys_pp.105.067223_1.pdf [file plntphys_pp.105.067223_1.pdf]
